# Supplementary material for: Gentirigeoside B from Gentiana rigescens Franch Prolongs Yeast Lifespan via Inhibition of TORC1/Sch9/Rim15/Msn Signaling Pathway and Modification of Oxidative Stress and Autophagy
Source: MDPI journal article supplement (doi:10.3390/antiox11122373), 2022-11-30
Supplement: s1 [file s1]

## Supplementary Information

### **Gentirigeoside B from *G. rigescens* Franch Prolongs Yeast Lifespan via Inhibition of TORC1/Sch9/Rim15/Msn Signaling Pathway and Modification of Anti-Oxidative Stress and Autophagy**

Lan Xiang<sup>1\*</sup>, Dejene Disasa<sup>1&</sup>, Yanan Liu<sup>1&</sup>, Rui Fujii<sup>2</sup>, Mengya Yang<sup>1</sup>, Enchan Wu<sup>1</sup>, Akira Matsuura<sup>2</sup> and Jianhua Qi<sup>1\*</sup>

1. College of Pharmaceutical Science, Zhejiang University, 866 Yu Hang Road, Hangzhou, China, 11719053@zju.edu.cn (D.D.); liuyan1231@zju.edu.cn (Y. L.); 11819026@zju.edu.cn (M.Y.); 22019019@zju.edu.cn (E.W.)

2. Department of Biology, Graduate School of Science, Chiba University, Chiba 263-8522, Japan, afga1829@chiba-u.jp (R.F.); amatsuur@faculty.chiba-u.jp (A.M.)

& Represents equal contribution

\*Correspondence should be addressed to Lan Xiang (lxiang@zju.edu.cn); Jianhua Qi (qijianhua@zju.edu.cn); Tel and Fax: +86-571-8820-8627

**Supplementary Table S1. List of primers sequence used for RT-PCR study.**

| Genes  | Species | Sequences                                       | Gene ID    |
|--------|---------|-------------------------------------------------|------------|
| SOD1   | Yeast   | sense: 5'-CAC CAT TTT CGT CCG TCT TT-3'         | 853568     |
|        |         | antisense 5'-TGG TTG TGT CTC TGC TGG TC-3'      |            |
| SOD2   | Yeast   | sense: 5'-CTC CGG TCAAAT CAA CGA AT-3'          | 856399     |
|        |         | anti-sense: 5'-CCT TGG CCAGAA GAT CTG AG-3'     |            |
| GPx    | Yeast   | anti-sense: 5'-CCT TGG CCAGAA GAT CTG AG-3'     | S000001509 |
|        |         | sense: 5'-CGC TCC GTC AAG TAA ACA TAG G-3'      |            |
| CAT    | Yeast   | anti-sense:5'-GGC CGC TGT TAT TGT TTT GAA C-3'  | S000002664 |
|        |         | sense: 5'-TGA CAA ACT CCA CTG GTA ATC C-3'      |            |
| TUB1   | Yeast   | anti-sense: 5'-TCC CTG TTG AAA TGA GCC AA-3'    | 854889     |
|        |         | sense: 5'-CCA AGG GCT ATT TAC GTG GA-3'         |            |
| TORC1  | Yeast   | sense: 5'-TTG GTA CAA GGC ATG GCA TA-3'         | S000218103 |
|        |         | anti-sense: 5'-TAC CGT CAA TCC GCA CAT TA-3'    |            |
| SIR2   | Yeast   | sense: 5'-CGT TCC CCA AGT CCT GAT TA-3'         | 851520     |
|        |         | anti-sense: 5'-CCA CAT TTT TGG GCT ACC AT-3'    |            |
| RPS26A | Yeast   | sense: 5'-TCA GAA ACA TTG TTG AAG CCG C-3'      | 852686     |
|        |         | anti-sense: 5'-ACA ATT CTG GCG TGA ATA GCA C-3' |            |
| RPL9A  | Yeast   | sense: 5'-ATG GTG CCA AAT TCA TTG AAG TC-3'     | 852730     |
|        |         | anti-sense 5'-AGTTACCTGACAAGACAATTTTCG-3'       |            |
| SCH9   | Yeast   | sense:5'-GCC ATT GAT GAT GGA AGA GAA CTAC-3'    | 856612     |
|        |         | anti-sense:5'- TCATATTTTGAATCTTCCACTGAC-3'      |            |
| RIM15  | Yeast   | sense: 5'-GGA GCT GGA ACT GGA CGG CAAG -3'      | 850511     |
|        |         | anti-sense: 5'-AGC ATG TCT GTG GCC TTT TGAA-3'  |            |
| MSN2   | Yeast   | sense: 5'-AGA ACG ATA TGC TGC CGA ATTC-3'       | 855053     |
|        |         | anti-sense: 5'-CGCCACTTTTCGCAATAACG-3'          |            |
| MSN4   | Yeast   | sense: 5'-GGATTGATGGACCCGGTATTG-3'              | 853803     |
|        |         | anti-sense: 5'-CCAAAGGTATATTCCGGCGAA-3'         |            |

**Supplementary Table S2. Yeast strains were used in the present study.**

| Strains                                                                                                     | Genome-type                                                                                                                       | Source                                  |
|-------------------------------------------------------------------------------------------------------------|-----------------------------------------------------------------------------------------------------------------------------------|-----------------------------------------|
| K6001                                                                                                       | MAta, Ade2-1, trp1-1, can1-100, leu2-3, 112, his-3-11, 15, GAL, psi+, ho::HO::CDC6 (at HO), cdc6::hisG, URA3 GAL-ubiR-CDC6 (URA3) | Gifted by Prof. Michael Breitenbach     |
| <i>Δuth1</i> , <i>Δskn7</i> , <i>Δcat</i> , <i>Δgpx</i> , <i>Δsod1</i> , <i>Δsod2</i> with K6001 background | Replacement of UTH1, SKN7, SOD1 and SOD2 with Kanamycin gene.                                                                     | Constructed by professor Akira Matsuura |
| BY4741                                                                                                      | Mata, his3Δ1, Leu2Δ0, met15Δ0, ura3Δ0                                                                                             | Constructed by professor Akira Matsuura |
| MSN2-GFP yeast with BY4741 background                                                                       | Mata, his3Δ1, Leu2Δ0, met15Δ0, ura3Δ0; MSN2-GFP::KanMX                                                                            | Constructed by professor Akira Matsuura |
| sfGFP-SCH9 yeast with BY4741 background                                                                     | Mata, his3Δ1, Leu2Δ0, met15Δ0, ura3Δ0; sfGFP-SCH9-5HA::LEU2                                                                       | Constructed by professor Akira Matsuura |
| RIM15-GFP yeast with BY4741 background                                                                      | Mata, his3Δ1, Leu2Δ0, met15Δ0, ura3Δ0, RIM15-GFP::His3MX                                                                          | Constructed by professor Akira Matsuura |
| YOM36                                                                                                       | Prototrophic derivative of BY4742 (MAT $\alpha$ , his3Δ1, leu2Δ0, lys2Δ0, ura3Δ0)                                                 | Gifted by professor Akira Matsuura      |
| YOM38 containing plasmid pR316-GFP-ATG8                                                                     | Prototrophic derivative of BY4742 (MAT $\alpha$ , his3Δ1, leu2Δ0, lys2Δ0, ura3Δ0) containing plasmid pR316-GFP-ATG8               | Constructed by professor Akira Matsuura |

## Supplementary Figures

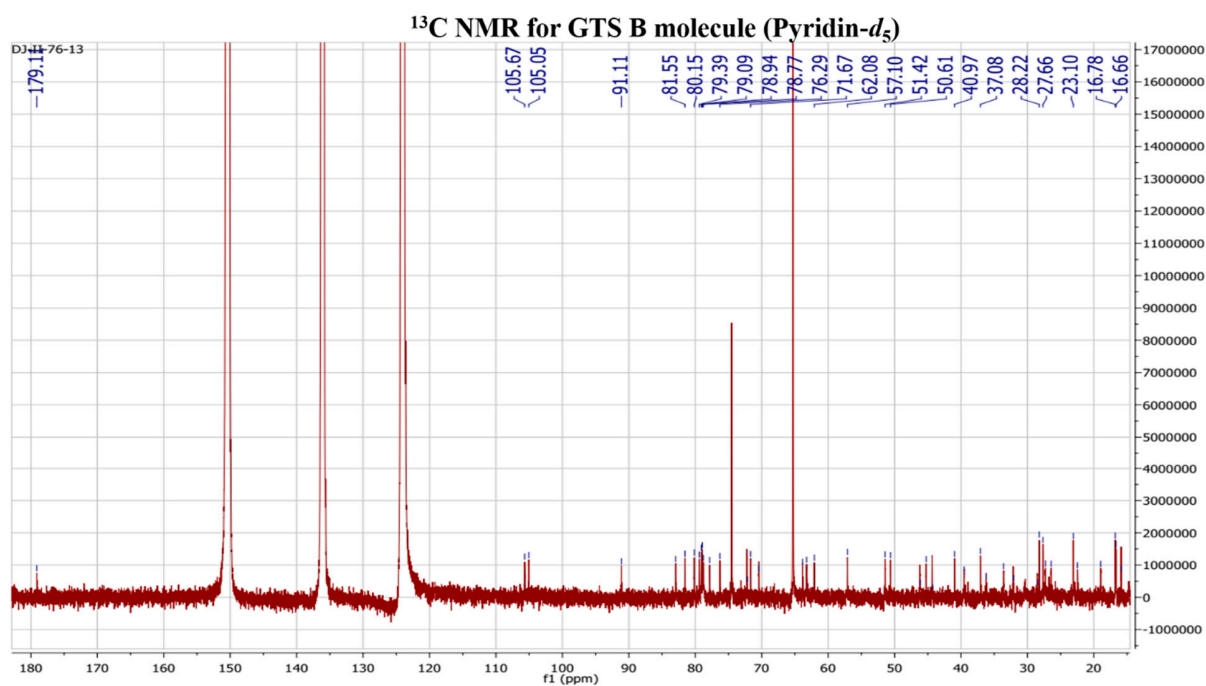

**Supplementary Figure S1.** The <sup>13</sup>C NMR spectrum of Gentirigeoside B from *G. rigescens* Franch L.

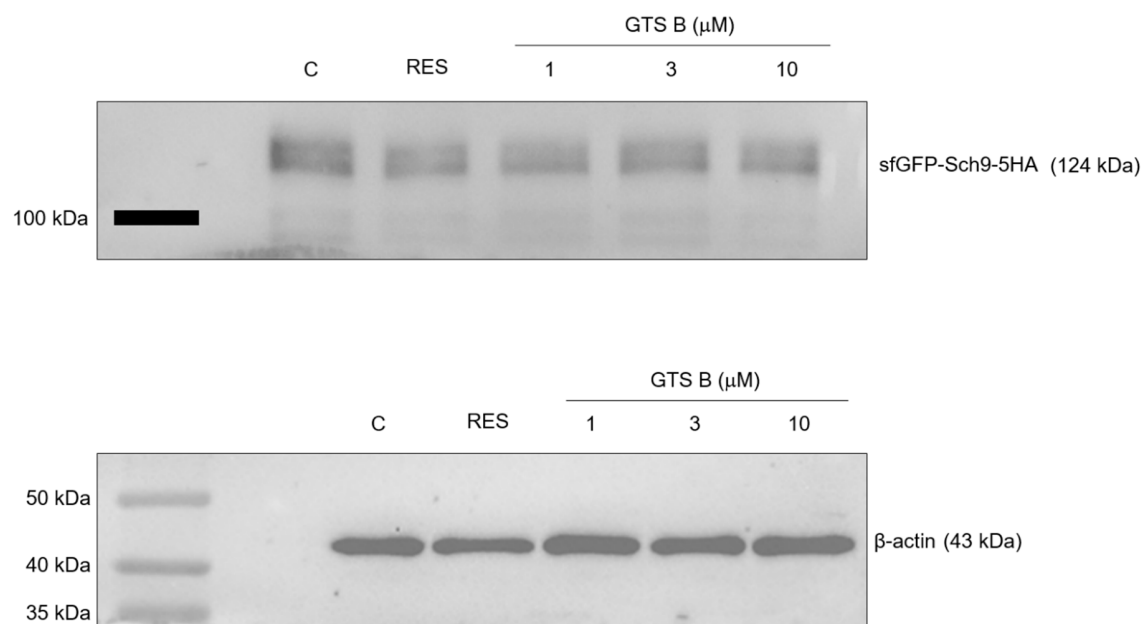

**Supplementary Figure S2.** The original results of western blotting analysis for Sch9 in Figure 3(b).
